# Supplementary material for: Controllable incorporation of Ag and Ag–Au nanoparticles in carbon spheres for tunable optical and catalytic properties
Source: Royal Society of Chemistry journal article supplement (doi:10.1039/c0jm00456a), 2010-01-01
Supplement: c0jm00456a.pdf [file c0jm00456a.pdf]

## Supporting Online Material for

### **Controllable incorporation of Ag and Ag-Au nanoparticles in carbon spheres for tunable optical and catalytic properties**

Shaochun Tang, Sascha Vongehr, and Xiangkang Meng<sup>\*</sup>

National Laboratory of Solid State Microstructures, Department of Materials Science and Engineering, Nanjing University, Nanjing 210093, P. R. China

<sup>\*</sup>To whom correspondence should be addressed. E-mail: mengxk@nju.edu.cn.

**This PDF file includes:**

Figure S1 to S6

## Supplementary Materials

### Controllable incorporation of Ag and Ag-Au nanoparticles in carbon spheres for tunable optical and catalytic properties

Shaochun Tang, Sascha Vongehr, and Xiangkang Meng\*

#### Figure captions (Figure S1 to S6)

**Fig. S1** FTIR spectrum of the as-prepared CSs.

**Fig. S2** TEM images of a product obtained after microwaving a suspension of CSs in a  $\text{HAuCl}_4$  solution ( $C_{\text{HAuCl}_4} = 2 \times 10^{-4} \text{ mol/L}$ ,  $t_I = 4 \text{ h}$ , and MW power = 140 W) in the presence of PVP. Au NPs only formed on the surfaces of the CSs under these conditions (without previous Ag doping).

**Fig. S3** UV-Vis absorption spectra of suspension of bare CSs in aqueous solution (black curve) and the product from a microwave synthesis at 140 W for 10 min *without* PVP and even without microwaving (blue curve).

**Fig. S4** SEM-EDS spectrum recorded from the product shown in Fig. 6e.

**Fig. S5** XPS survey spectra (a) and XPS Au 4f signals (b) of Ag-C (red line) and Ag-Au-C (blue line) composite particles shown in Fig. 1b and 5a.

**Fig. S6** High resolution XPS spectra of Ag 3d (a) and Au 4f (b) of the Ag-Au-C composites after being used three times as a catalyst reducing 4-NP.

**Fig. S1**

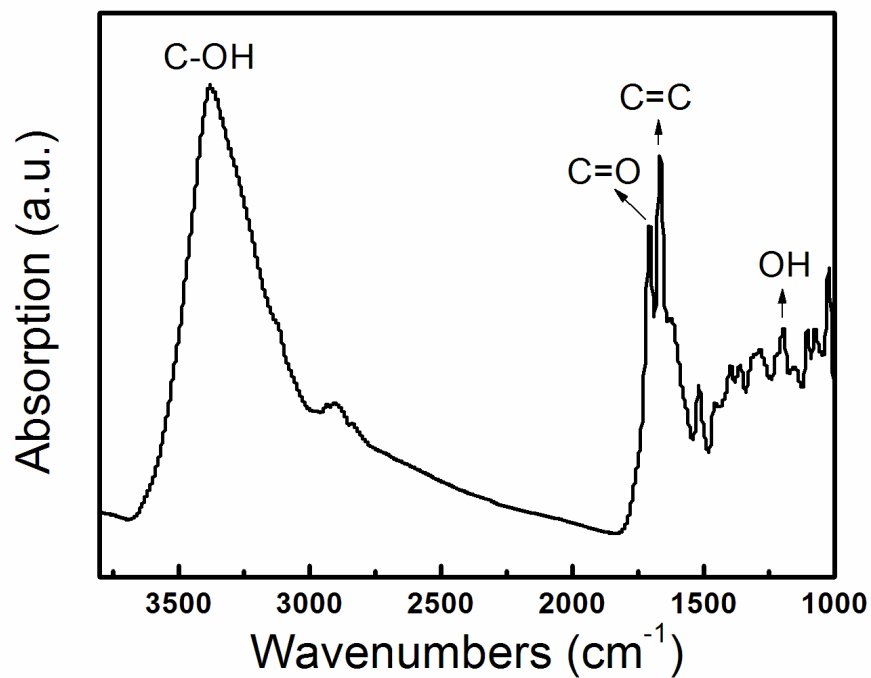

**Fig. S1** FTIR spectrum of the as-prepared CSs

**Fig. S2**

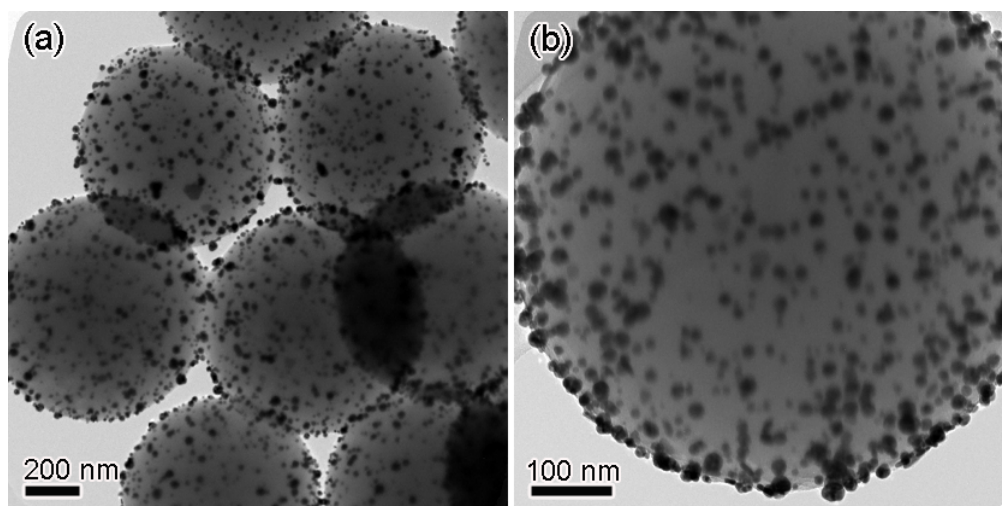

**Fig. S2** TEM images of a product obtained after microwaving a suspension of CSs in  $\text{HAuCl}_4$  solutions ( $C_{\text{HAuCl}_4} = 2 \times 10^{-4} \text{ mol/L}$ ,  $t_I = 4 \text{ h}$ , and MW power  $\langle P \rangle = 140 \text{ W}$ ) in the presence of PVP. Au NPs only formed on the surfaces of the CSs under these conditions (without previous Ag doping).

**Fig. S3**

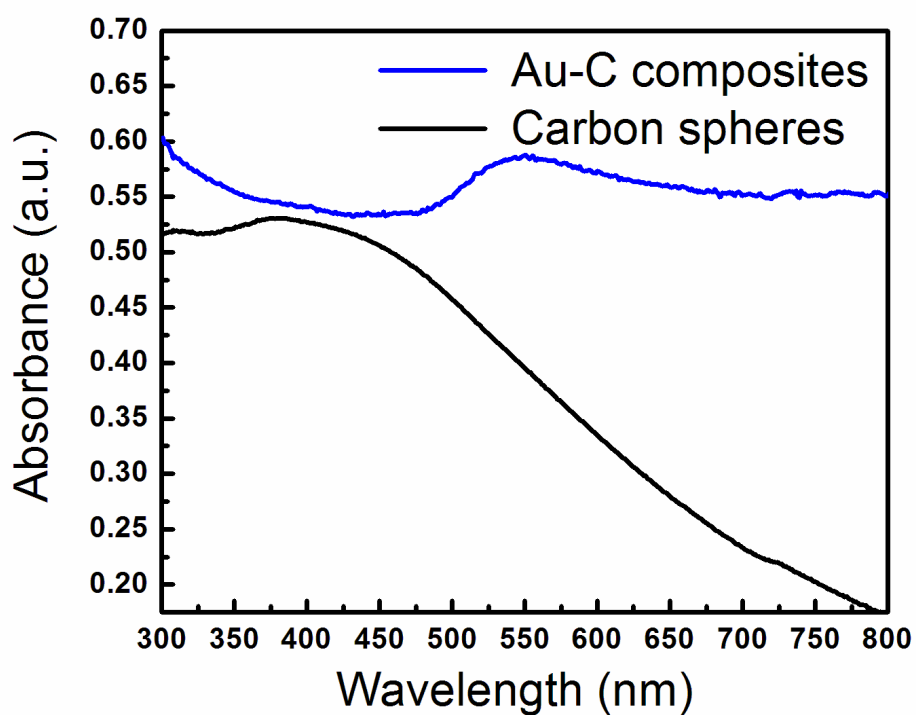

**Fig. S3** UV-Vis absorption spectra of suspension of bare CSs in aqueous solution (black curve) and the product form a microwave synthesis at 140 W for 10 min *without* PVP and even without microwaving (blue curve).

**Fig. S4**

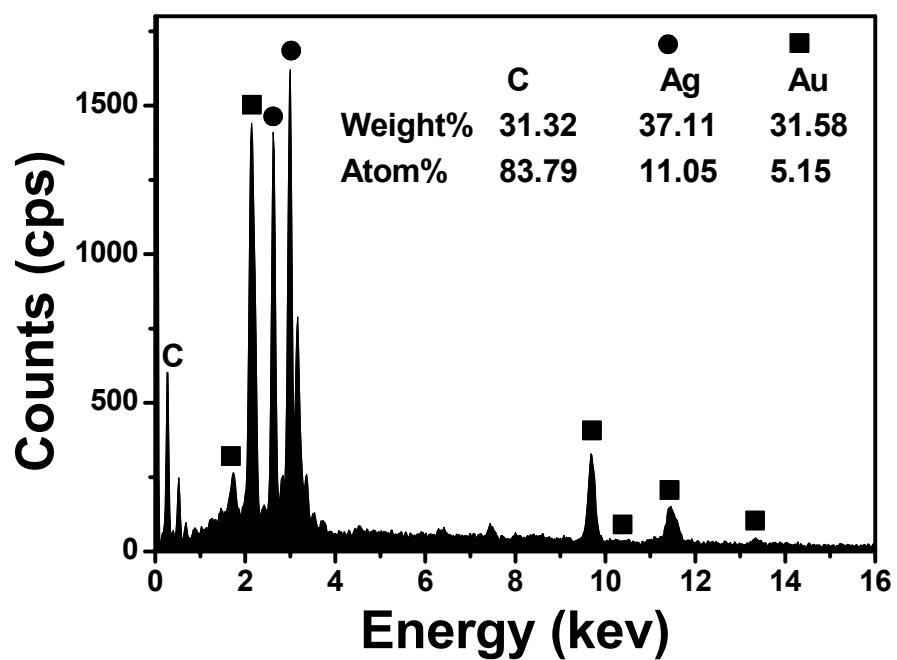

**Fig. S4** SEM-EDS spectrum recorded from the product shown in Fig. 6e.

**Fig. S5**

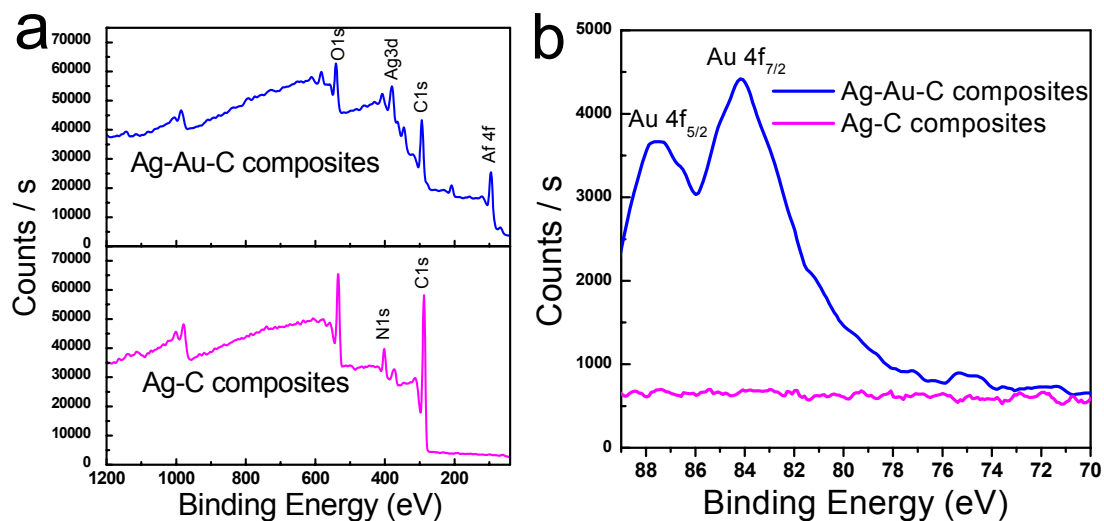

**Fig. S5** XPS survey spectra (a) and XPS Au 4f signals (b) of Ag-C (red line) and Ag-Au-C (blue line) composite particles shown in Fig. 1b and 5a.

**Fig. S6**

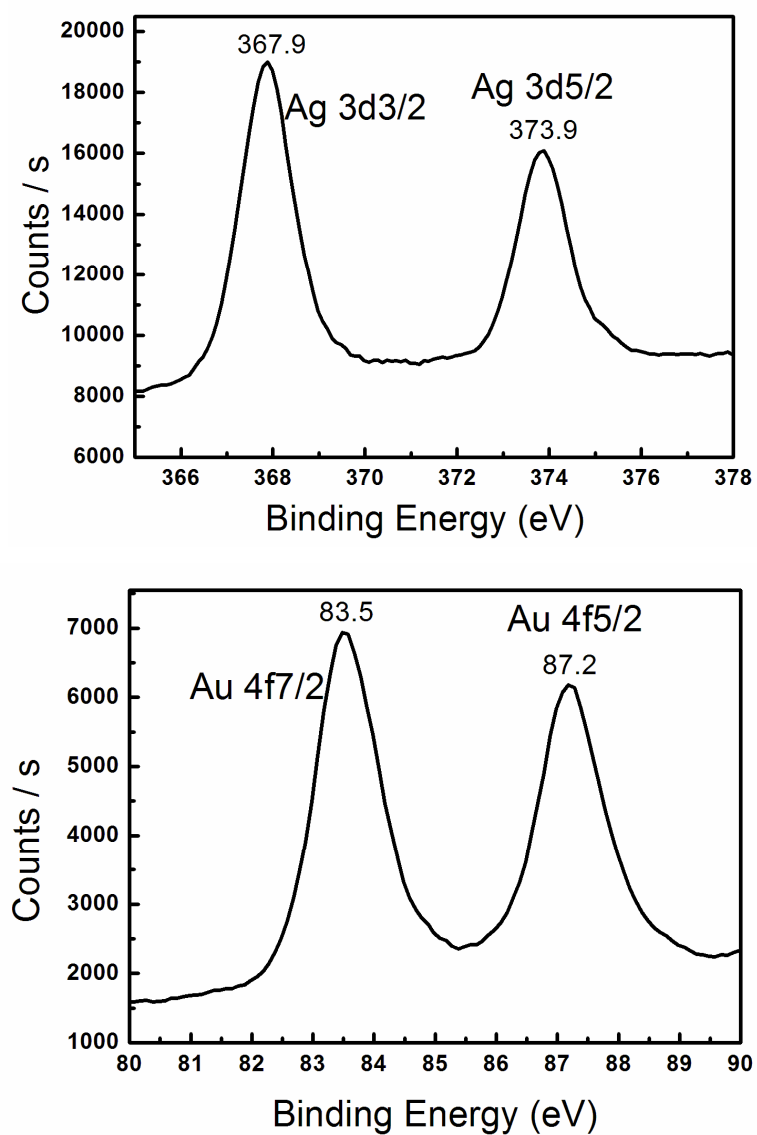

**Fig. S6** High resolution XPS spectra of Ag 3d (a) and Au 4f (b) of the Ag-Au-C composites after being used three times as a catalyst reducing 4-NP.
